# Supplementary material for: Genomic Analysis of a Novel Phage Infecting the Turkey Pathogen Escherichia coli APEC O78 and Its Endolysin Activity
Source: MDPI journal article supplement (doi:10.3390/v13061034), 2021-05-31
Supplement: s1 [file s1]

**Table S1.** All predicted open reading frames (ORFs) for bacteriophage vB\_EcoM\_APEC.

| ORF | Start  | End    | Length (bp) | Protein mass (kDa) | Product                         |
|-----|--------|--------|-------------|--------------------|---------------------------------|
| 1   | 35     | 448    | 414         | 15.51              | Hypothetical protein            |
| 2   | 451    | 906    | 456         | 15.72              | Hypothetical protein            |
| 3   | 910    | 2949   | 2040        | 74.55              | Hypothetical protein            |
| 4   | 2946   | 5558   | 2613        | 93.13              | Lytic transglycosylase          |
| 5   | 5780   | 8089   | 2310        | 84.23              | Minor capsid protein            |
| 6   | 8281   | 8673   | 393         | 15.11              | Hypothetical protein            |
| 7   | 8673   | 10,346 | 1674        | 63.27              | DNA-packaging protein           |
| 8   | 10,358 | 12,787 | 2430        | 86.74              | Tail fiber protein              |
| 9   | 12,868 | 13,206 | 339         | 12.58              | Holin                           |
| 10  | 13,190 | 13,474 | 285         | 10.61              | Hypothetical protein            |
| 11  | 13,476 | 14,084 | 609         | 22.96              | Endolysin                       |
| 12  | 14,096 | 14,293 | 198         | 7.58               | Hypothetical protein            |
| 13  | 14,290 | 14,490 | 201         | 7.92               | Head portal-like protein        |
| 14  | 14,456 | 14,836 | 381         | 14.76              | Hypothetical protein            |
| 15  | 14,836 | 15,189 | 354         | 13.07              | Hypothetical protein            |
| 16  | 15,186 | 15,491 | 306         | 11.58              | Small distal tail fiber subunit |
| 17  | 15,534 | 15,710 | 177         | 6.85               | Hypothetical protein            |
| 18  | 15,719 | 16,330 | 612         | 22.91              | Phage-type exonuclease          |
| 19  | 16,330 | 17,028 | 699         | 25.88              | Hypothetical protein            |
| 20  | 17,102 | 17,260 | 159         | 6.19               | Hypothetical protein            |
| 21  | 17,250 | 17,609 | 360         | 13.44              | Hypothetical protein            |
| 22  | 17,606 | 17,968 | 363         | 14.53              | Hypothetical protein            |
| 23  | 17,965 | 18,351 | 387         | 14.64              | Hypothetical protein            |
| 24  | 18,339 | 18,866 | 528         | 19.93              | Hypothetical protein            |
| 25  | 19,057 | 19,497 | 441         | 16.85              | HNH endonuclease                |
| 26  | 19,494 | 19,754 | 261         | 9.60               | Hypothetical protein            |
| 27  | 20,073 | 20,258 | 186         | 7.15               | Hypothetical protein            |
| 28  | 20,255 | 20,890 | 636         | 24.67              | Hypothetical protein            |
| 29  | 20,887 | 21,078 | 192         | 7.41               | Hypothetical protein            |
| 30  | 21,207 | 21,437 | 231         | 8.84               | Prophage anti-repressor         |
| 31  | 21,430 | 21,642 | 213         | 8.47               | Tail fiber protein              |
| 32  | 21,652 | 22,389 | 738         | 27.99              | Replication protein O           |
| 33  | 22,389 | 23,693 | 1305        | 48.56              | Replicative DNA helicase        |
| 34  | 23,878 | 24,066 | 189         | 7.33               | Hypothetical protein            |
| 35  | 24,110 | 24,280 | 171         | 6.89               | Hypothetical protein            |
| 36  | 24,447 | 24,713 | 267         | 9.98               | Hypothetical protein            |
| 37  | 24,706 | 24,918 | 213         | 8.05               | Hypothetical protein            |
| 38  | 24,983 | 25,162 | 180         | 6.90               | Ribonuclease H                  |
| 39  | 25,149 | 25,550 | 402         | 15.45              | Hypothetical protein            |
| 40  | 25,761 | 26,726 | 966         | 37.51              | Repressor                       |
| 41  | 26,786 | 27,058 | 273         | 10.63              | Hypothetical protein            |
| 42  | 27,148 | 27,780 | 633         | 24.65              | HNH homing endonuclease         |
| 43  | 27,773 | 28,354 | 582         | 22.35              | Terminase large subunit         |
| 44  | 28,341 | 28,718 | 378         | 13.94              | Hypothetical protein            |
| 45  | 29,153 | 29,383 | 231         | 8.84               | Hypothetical protein            |
| 46  | 29383  | 29574  | 192         | 6.59               | Hypothetical protein            |
| 47  | 29,571 | 31,187 | 1617        | 60.60              | Head to tail connecting protein |
| 48  | 31,177 | 31,530 | 354         | 13.89              | Sigma factor regulator          |

|    |        |        |      |       |                         |
|----|--------|--------|------|-------|-------------------------|
| 49 | 31,527 | 32,180 | 654  | 23.43 | Capsid assembly protein |
| 50 | 32,195 | 33,085 | 891  | 32.84 | Major capsid protein    |
| 51 | 33,134 | 33,721 | 588  | 22.12 | Tail tubular protein A  |
| 52 | 33,651 | 35,828 | 2178 | 80.17 | Tail tubular protein B  |

**Table S2.** Oligonucleotide primers pairs used in this study of endolysin LysO78 and mutants.

| Primer pairs  | Sequence (5'-3')                                 |
|---------------|--------------------------------------------------|
| E54A-For      | TTGGCATgcaACTGCAAAAACCATGCAGCCAA                 |
| E54A-Rev      | TTGCAGTtgcATGCCAAGTTGTAGCGAGCATG                 |
| E54Q-For      | TTGGCATcagACTGCAAAAACCATGCAGCCAA                 |
| E54Q-Rev      | TTGCAGTctgATGCCAAGTTGTAGCGAGCATG                 |
| E54D-For      | CTTGGCATgataCTGCAAAAACCATGCAGCCA                 |
| E54D-Rev      | TGCAGTatcATGCCAAGTTGTAGCGAGCATGT                 |
| E63A-For      | GCAGCCAATTgcaGAATATGGAAAGGGTAAAGGCCG             |
| E63A-Rev      | ATTctgAATTGGCTGCATGGTTTTTGCAGTT                  |
| E63Q-For      | GCAGCCAATTcagGAATATGGAAAGGGTAAAGGCCG             |
| E63Q-Rev      | ATTctgAATTGGCTGCATGGTTTTTGCAGTT                  |
| E64A-For      | GAAgcaTATGGAAAGGGTAAAGGCCGTCCTTA                 |
| E64A-Rev      | CCCTTTCCATAtgcTTCAATTGGCTGCATGGTTTT              |
| E64Q-For      | GAAcagTATGGAAAGGGTAAAGGCCGTCCTTA                 |
| E64Q-Rev      | CCCTTTCCATActgTTCAATTGGCTGCATGGTTTT              |
| E54A/E63A-For | gcaaaaaccatgcagccaattgcaGAATATGGAAAGGGTAAAGGCCG  |
| E54A/E63A-Rev | tggctgcatggttttgcagttgcaATGCCAAGTTGTAGCGAGCAT    |
| E54Q/E63Q-For | gcaaaaaccatgcagccaattcagGAATATGGAAAGGGTAAAGGCCG  |
| E54Q/E63Q-Rev | tggctgcatggttttgcagttctgATGCCAAGTTGTAGCGAGCAT    |
| E54A/E64A-For | caaaaaccatgcagccaattgaaagcaTATGGAAAGGGTAAAGGCCGT |
| E54A/E64A-Rev | tggctgcatggttttgcagttgcaATGCCAAGTTGTAGCGAGCAT    |
| E54Q/E64Q-For | caaaaaccatgcagccaattgaaacagTATGGAAAGGGTAAAGGCCGT |
| E54Q/E64Q-Rev | tggctgcatggttttgcagttctgATGCCAAGTTGTAGCGAGCAT    |

The lowercase characters marked in red indicate nucleotides corresponding to the mutated amino acid site(s).

**Table S3.** The predicted prophages of *Chitinimonas arctica* R3-44<sup>T</sup>.

| Region | Length (kb) | Completeness | Most Common Phage | Host strain                   | GenBank number |
|--------|-------------|--------------|-------------------|-------------------------------|----------------|
| 1      | 53.8        | questionable | vB_EcoM_ECOO78    | <i>E. coli</i> APEC O78       | NC_041926      |
| 2      | 4.6         | incomplete   | Stx2a_F451        | <i>E. coli</i> O157:H7        | NC_049924      |
| 3      | 37.8        | incomplete   | vB_EcoM_ECOO78    | <i>E. coli</i> APEC O78       | NC_041926      |
| 4      | 30.8        | intact       | MD8               | <i>Pseudomonas aeruginosa</i> | NC_031091      |
| 5      | 34          | intact       | RSA1              | <i>Ralstonia solanacearum</i> | NC_009382      |
| 6      | 17.5        | incomplete   | phiPSA1           | <i>Pseudomonas syringae</i>   | NC_024365      |
| 7      | 26          | intact       | vB_EcoM_ep3       | <i>E. coli</i> CC11           | NC_025430      |
| 8      | 36.4        | incomplete   | phiPSA1           | <i>Pseudomonas syringae</i>   | NC_024365      |
| 9      | 13.9        | incomplete   | vB_EcoM_ECOO78    | <i>E. coli</i> APEC O78       | NC_041926      |
| 10     | 8.9         | incomplete   | SfIV              | <i>Shigella flexneri</i>      | NC_022749      |
| 11     | 29.1        | intact       | RSY1              | <i>Ralstonia solanacearum</i> | NC_025115      |

Region: the number assigned to the region; Length: the length of the sequence of that region (in kb); Completeness: a prediction of whether the region contains an intact or incomplete prophage based

on the above criteria; Total Proteins: the number of ORFs present in the region; Most Common Phage: the phage(s) with the highest number of proteins similar to those in the region.

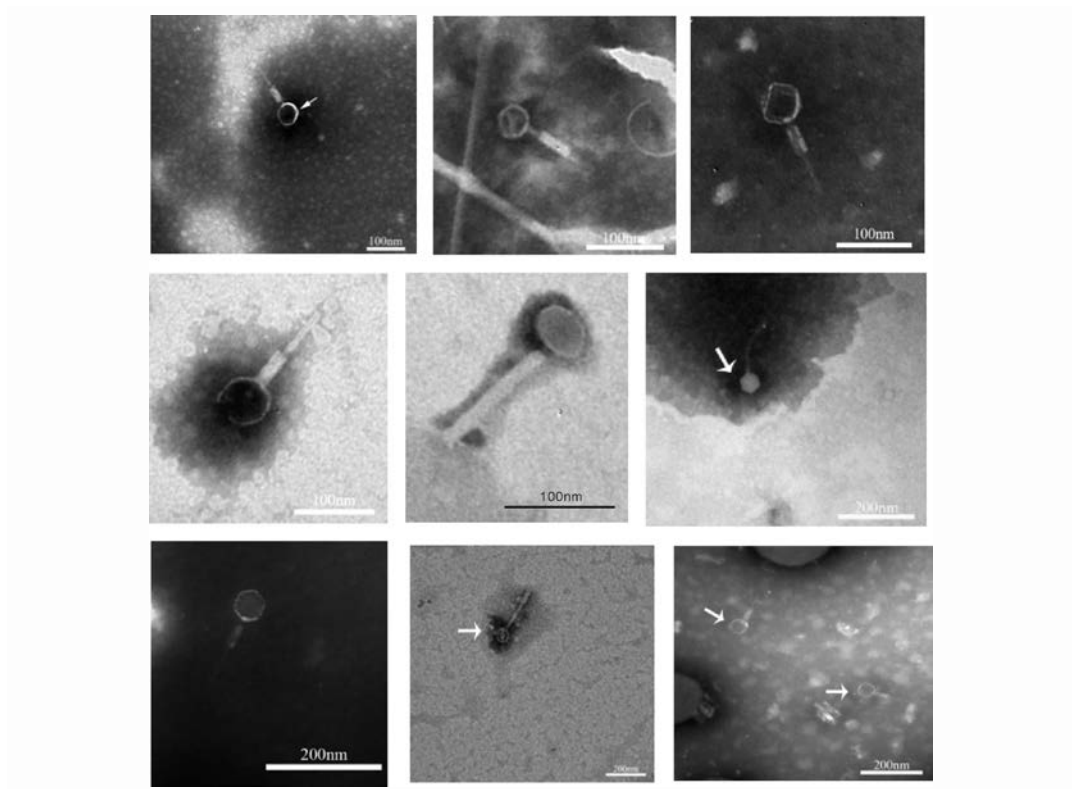

**Figure S1.** The induced prophage morphology of *Chitinimonas arctica* R3-44<sup>T</sup> under TEM.

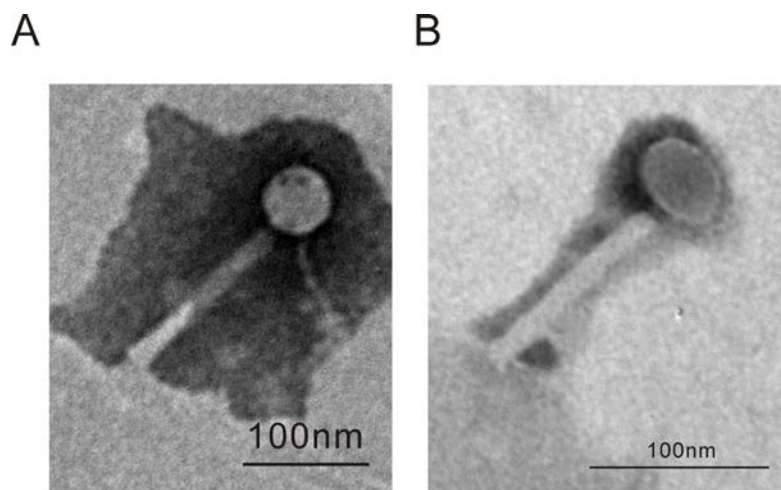

**Figure S2.** Phage morphology under TEM. (A) The phage morphology of vB\_EcoM\_APEC. (B) The phage morphology in the MMC-induced supernatant of *Chitinimonas arctica* R3-44<sup>T</sup>.

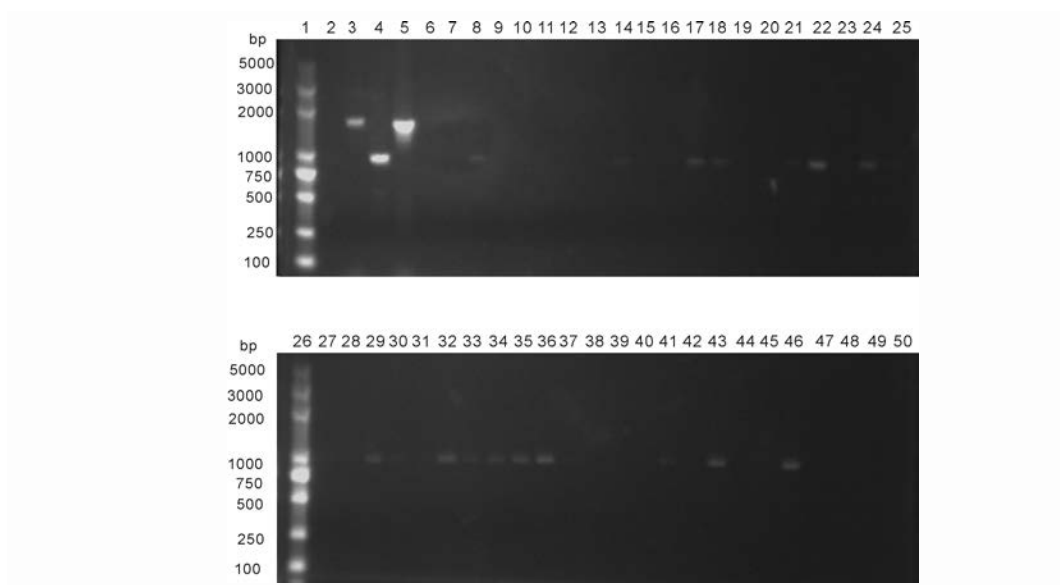

**Figure S3.** PCR detection of the major capsid gene in *Chitinimonas arctica* R3-44<sup>T</sup>. Lane 1 and 26, DL5000 Marker; Lane 2, negative control; Lane 3, 16S rDNA from phage genome (residual genomic DNA of host strain *E. coli* APEC O78); Lane 4, positive control of major capsid gene; Lane 5, 16S rDNA from single colony of *Chitinimonas arctica* R3-44<sup>T</sup>; Lanes 6–25 and 27–50, the detection of the major capsid gene from different colonies of *Chitinimonas arctica* R3-44<sup>T</sup>. In order to evaluate DNA availability from different colonies, 16S rDNA was detected.

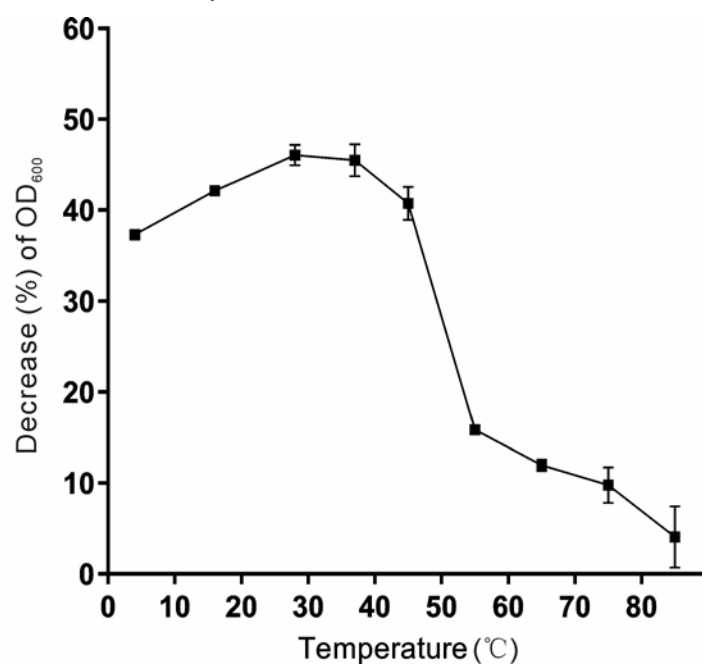

**Figure S4.** Influence of the reaction temperature on endolysin LysO78. The decrease (%) in optical density at 600 nm (OD<sub>600</sub>) = (1– absorbance of the bacterial suspension at the end of each treatment/absorbance at the beginning of each treatment) × 100%.
